# Supplementary material for: Atomic structures and orbital energies of 61,489 crystal-forming organic molecules
Source: PubMed Central journal article supplement (PMC7029047; doi:10.1038/s41597-020-0385-y), 2020-02-18
Supplement: 41597_2020_385_MOESM1_ESM.pdf [file 41597_2020_385_MOESM1_ESM.pdf]

# Supplementary Information

## Contents

- 1) Computational settings
- 2) def2-QZVP basis set for iodine
- 3) Technical validation of all occupied  $G_0W_0$  quasiparticle states

### 1) Computational settings

#### DFT PBE+vdW (vacuum) calculations

```
#General settings:
xc                pbe
spin              none
relativistic      atomic_zora scalar
occupation_type   gaussian 0.01
mixer              pulay
n_max_pulay       10
charge            0
charge_mix_param  0.2
default_initial_moment 0

# Convergence criteria:
sc_accuracy_eev   1E-3
sc_accuracy_etot  1E-6
sc_accuracy_rho   1E-5
sc_iter_limit     100

# Other settings:
prodbas_threshold 1.e-4
relax_geometry     trm 1E-3
vdw_correction_hirshfeld
packed_matrix_format  index
```

#### DFT PBE0 (vacuum) calculations

```
#General settings:
xc                pbe0
spin              none
relativistic      atomic_zora scalar
occupation_type   gaussian 0.01
mixer              pulay
n_max_pulay       10
charge            0
charge_mix_param  0.2
default_initial_moment 0
```

```

# Convergence criteria:
sc_accuracy_rho          1E-5
sc_accuracy_eev         1E-3
sc_accuracy_etot        1E-6
sc_iter_limit           100

# Other settings:
prodbas_threshold       1.e-4
vdw_correction_hirshfeld
packed_matrix_format    index

```

## DFT PBE0 (water) calculations

```

#General settings:
xc                      pbe0
spin                   none
relativistic           atomic_zora scalar
occupation_type        gaussian 0.01
mixer                  pulay
n_max_pulay            10
charge                 0
charge_mix_param       0.2
default_initial_moment 0

# Convergence criteria:
sc_accuracy_rho          1E-5
sc_accuracy_eev         1E-3
sc_accuracy_etot        1E-6
sc_iter_limit           100

# Other settings:
prodbas_threshold       1.e-4
vdw_correction_hirshfeld
packed_matrix_format    index
solvent                mpe
mpe_solvent_permittivity 78.36
isc_cavity_type        rho_free 0.0121
mpe_nonelectrostatic_model linear_OV 0.00291 -0.00225
mpe_lmax_rf            14.0
mpe_degree_of_determination 16.0
mpe_lmax_ep            8.0
isc_max_dyn_steps      1000
isc_kill_ratio         1.0e-3

```

## G<sub>0</sub>W<sub>0</sub>@PBE0 calculations

```

#General settings:
gpe_calc               gw
xc                    pbe0
relativistic           atomic_zora scalar
occupation_type        gaussian 0.0001
mixer                  pulay

```

```

n_max_pulay      10
charge_mix_param 0.2

# Convergence criteria:
sc_accuracy_rho  1E-6
sc_accuracy_eev  1E-4
sc_accuracy_etot 1E-6
sc_iter_limit    100

# Other settings:
prodbas_threshold 1.e-4
anacon_type       1
frequency_points  200
n_anacon_par      16
override_illconditioning .true.
RI_method         v

```

## 2) def2-QZVP basis set for iodine

---

```

species          I
# global species definitions
nucleus          53
mass             126.90447
l_hartree        6
cut_pot          4.0  2.0  1.0
basis_dep_cutoff 0.d0
radial_base      64  7.0
radial_multiplier 6
angular_grids    specified
  division       1.1798 194
  division       1.3657 302
  division       1.5819 434
  division       1.7978 590
outer_grid       770

```

---

```

# Definition of "minimal" basis
# valence basis states
  valence        5  s  2.
  valence        5  p  5.
  valence        4  d 10.
# ion occupancy
  ion_occ        5  s  1.
  ion_occ        5  p  4.
  ion_occ        4  d 10.

```

---

```

# For exact comparison with all GTO-based codes, one or more of
# the following flags are needed:

  include_min_basis .false.
  pure_gauss        .true.

```

---

#I def2-QZVP

gaussian 0 12

|              |                   |
|--------------|-------------------|
| 2858800923.1 | 0.93180377998E-08 |
| 362947182.93 | 0.29251660320E-06 |
| 25895129.209 | 0.49238597444E-05 |
| 4460334.5360 | 0.38960258418E-04 |
| 880899.58248 | 0.25876591258E-03 |
| 221418.55804 | 0.12385841119E-02 |
| 66902.706606 | 0.48235267455E-02 |
| 23226.795213 | 0.15583064855E-01 |
| 8615.8529208 | 0.46441583562E-01 |
| 3573.9145324 | 0.87051184822E-01 |
| 1794.5824834 | 0.11343892900     |
| 850.45867247 | 0.54927921531E-01 |

gaussian 0 4

|              |                   |
|--------------|-------------------|
| 14239.560861 | 0.52195064531E-02 |
| 3820.1734359 | 0.73018805288E-01 |
| 1448.8542868 | 0.35799348636     |
| 762.11441290 | 0.76902430693     |

gaussian 0 1 400.07563376

gaussian 0 1 207.99586804

gaussian 0 1 93.207388154

gaussian 0 1 47.765459426

gaussian 0 1 24.550232786

gaussian 0 1 12.090879108

gaussian 0 1 6.2765010441

gaussian 0 1 2.7542647749

gaussian 0 1 1.3387135879

gaussian 0 1 0.49497418409

gaussian 0 1 0.25248622219

gaussian 0 1 0.10298927907

gaussian 1 9

|              |                   |
|--------------|-------------------|
| 81817.656222 | 0.39698900367E-04 |
| 19362.496816 | 0.35499624328E-03 |
| 6270.1866595 | 0.20713055193E-02 |
| 2392.8261774 | 0.93203815875E-02 |
| 1013.4368905 | 0.33817222320E-01 |
| 464.22760436 | 0.97537230922E-01 |
| 221.75579791 | 0.22849921788     |
| 109.80480104 | 0.37589451352     |
| 55.045742477 | 0.33085898686     |

gaussian 1 5

|              |                    |
|--------------|--------------------|
| 3490.9946288 | 0.88809282998E-04  |
| 449.22593362 | 0.16224273869E-02  |
| 121.43614113 | -0.20946984795E-01 |
| 26.657569747 | 0.18421783179      |
| 9.8528237930 | 0.29164798721E-01  |

gaussian 1 4

|              |                    |
|--------------|--------------------|
| 351.70093301 | -0.76407514730E-02 |
| 56.155281403 | -0.10510879882E-02 |
| 13.455175872 | 0.61521964431      |
| 6.5609918621 | 0.36020414662      |

gaussian 1 2

|              |               |
|--------------|---------------|
| 4.2887611403 | 0.35087173331 |
| 2.2526244212 | 0.65636775384 |

```

gaussian 1 1 1.1534418891
gaussian 1 1 0.48252007546
gaussian 1 1 0.20049713189
gaussian 1 1 0.77422160270E-01
gaussian 2 8
  5202.7564499      0.55860101511E-04
  1561.5422849      0.58346576529E-03
  594.48186578      0.39438604353E-02
  252.58534246      0.20100542180E-01
  114.00698111      0.76566629696E-01
  53.528733479      0.21093133804
  25.720582750      0.37509517643
  12.496559121      0.36939862363
gaussian 2 3
  51.415770527      -0.44511873536E-02
  12.994996871      0.46399746597E-01
  6.0907370410      0.39721573389
gaussian 2 1 2.8294142727
gaussian 2 1 1.2670737878
gaussian 2 1 0.51177746489
gaussian 2 1 0.21000000000
gaussian 3 1 0.58650000000
gaussian 3 1 0.24940000000
gaussian 3 1 2.17800000000
gaussian 3 1 6.4253613600
gaussian 4 1 0.47300000000

```

### 3) Technical validation of all occupied $G_0W_0$ quasiparticle states

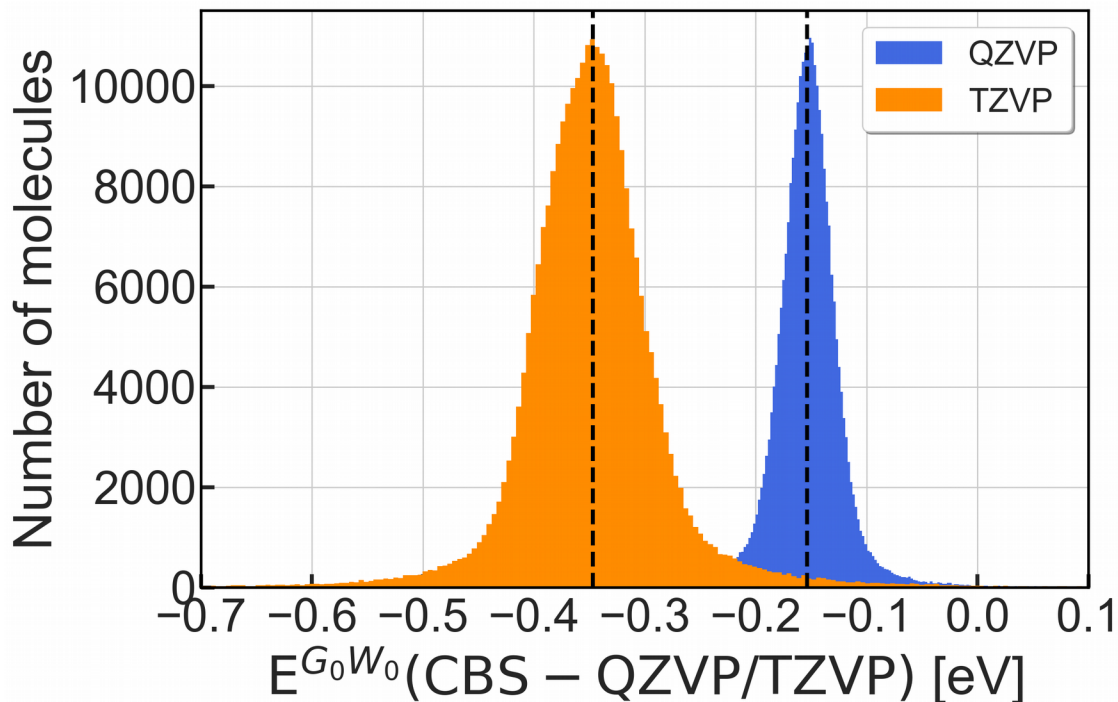

Figure 1: Deviation of all occupied states from the CBS limit for the 5k subset. The distributions are centered around -0.35 eV (TZVP) and -0.15 eV (QZVP), with a standard deviation of 0.03 eV (TZVP) and 0.02 (QZVP).
